# Supplementary material for: Modeling seasonal-to-decadal ocean–cryosphere interactions along the Sabrina Coast, East Antarctica
Source: Copernicus journal article supplement (doi:10.5194/tc-18-43-2024), 2024-01-03
Supplement: Supplementary file 1 [file tc-18-43-2024-supplement.pdf]

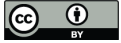

*Supplement of*

## **Modeling seasonal-to-decadal ocean–cryosphere interactions along the Sabrina Coast, East Antarctica**

**Kazuya Kusahara et al.**

*Correspondence to:* Kazuya Kusahara ([kazuya.kusahara@gmail.com](mailto:kazuya.kusahara@gmail.com), [kazuya.kusahara@jamstec.go.jp](mailto:kazuya.kusahara@jamstec.go.jp))

The copyright of individual parts of the supplement might differ from the article licence.

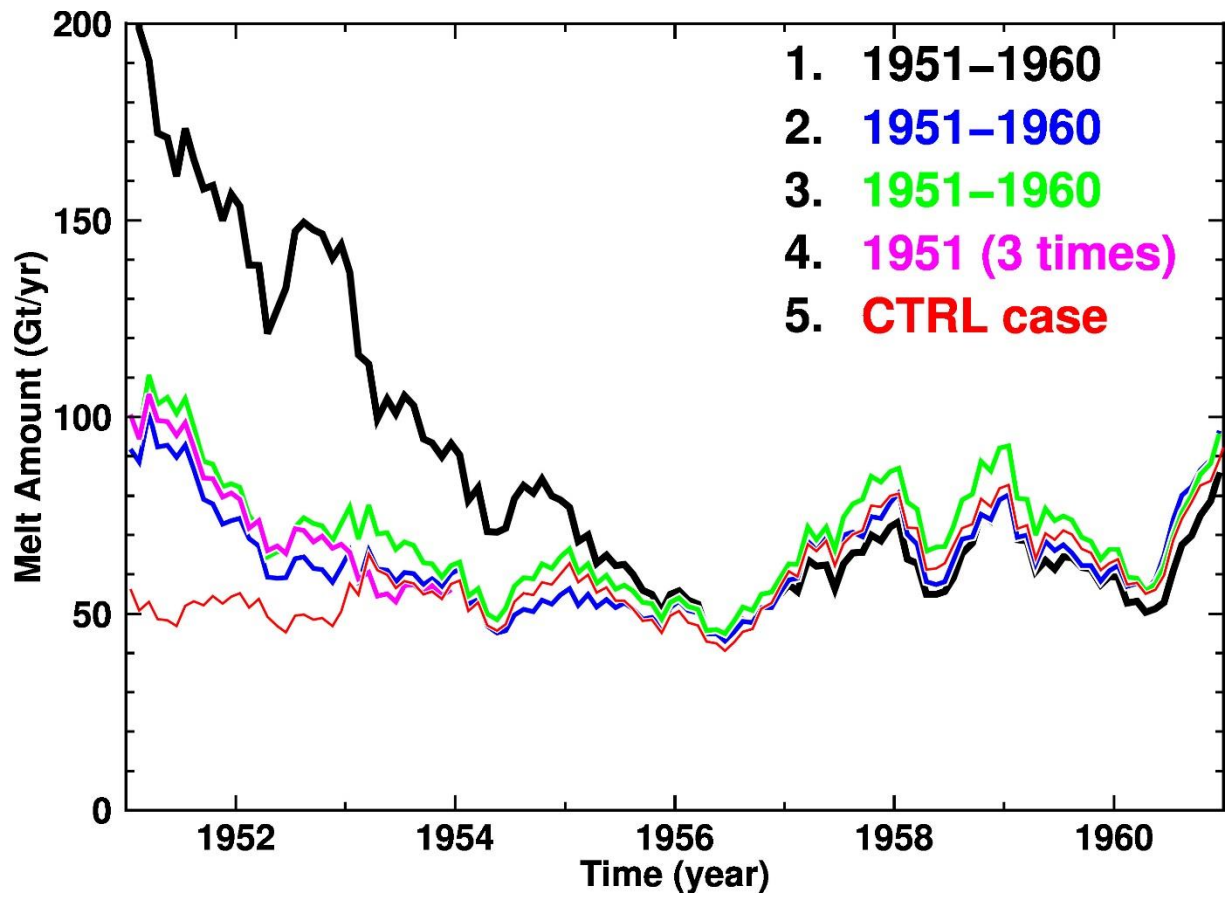

**Figure S1:** Time series of basal melt amount at ice shelves along the Sabrina Coast in model spin-up stages. After three cycles of 10-year integration with the 1951–1960 forcing (black, blue, and green), a three-year integration repeatedly with 1951 forcing (pink) was conducted to obtain the initial condition for CTRL case (red).

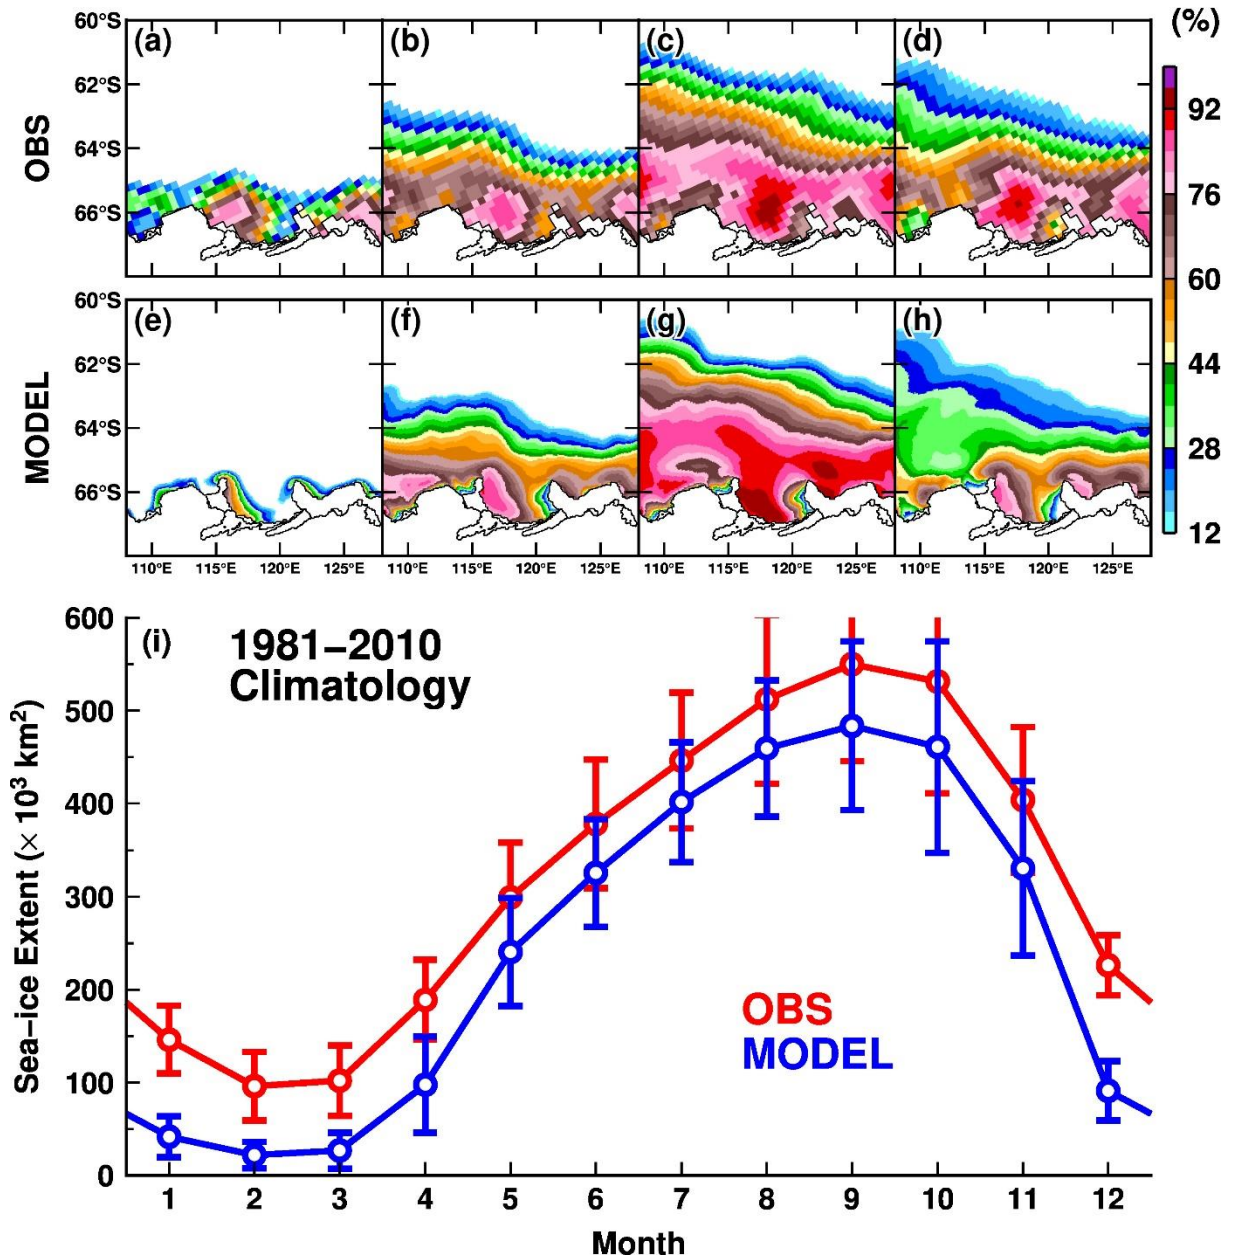

**Figure S2:** Seasonal cycle of observed and modeled sea-ice climatology averaged over the reference period (1981–2010). (a–h) Maps of sea-ice concentration in a longitudinal range from 108°E to 128°E (a–d: observation and e–h: model) and monthly sea-ice extent (red: observation and blue: model) within the longitudinal band.

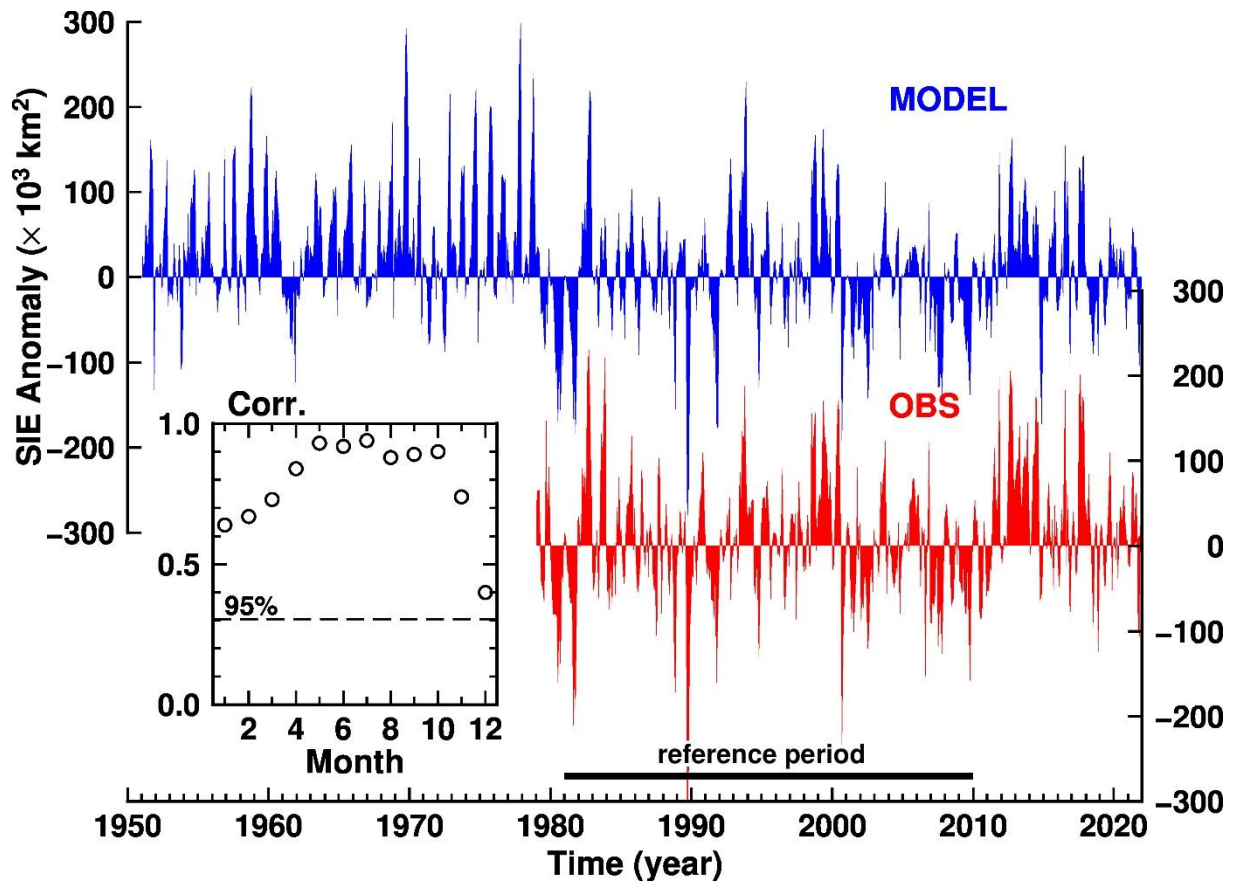

**Figure S3:** Time series of monthly sea-ice extent anomalies (blue: model for the period 1951–2021 and red: observation for the period 1979–2021). The anomalies are deviations of the regional monthly sea-ice extent from the monthly climatologies (Fig. S2i). Bottom-left small panel shows monthly correlation coefficients of sea-ice extent anomalies for the period 1979–2021 between the observation and model. The dashed line indicates the 95% significant level.

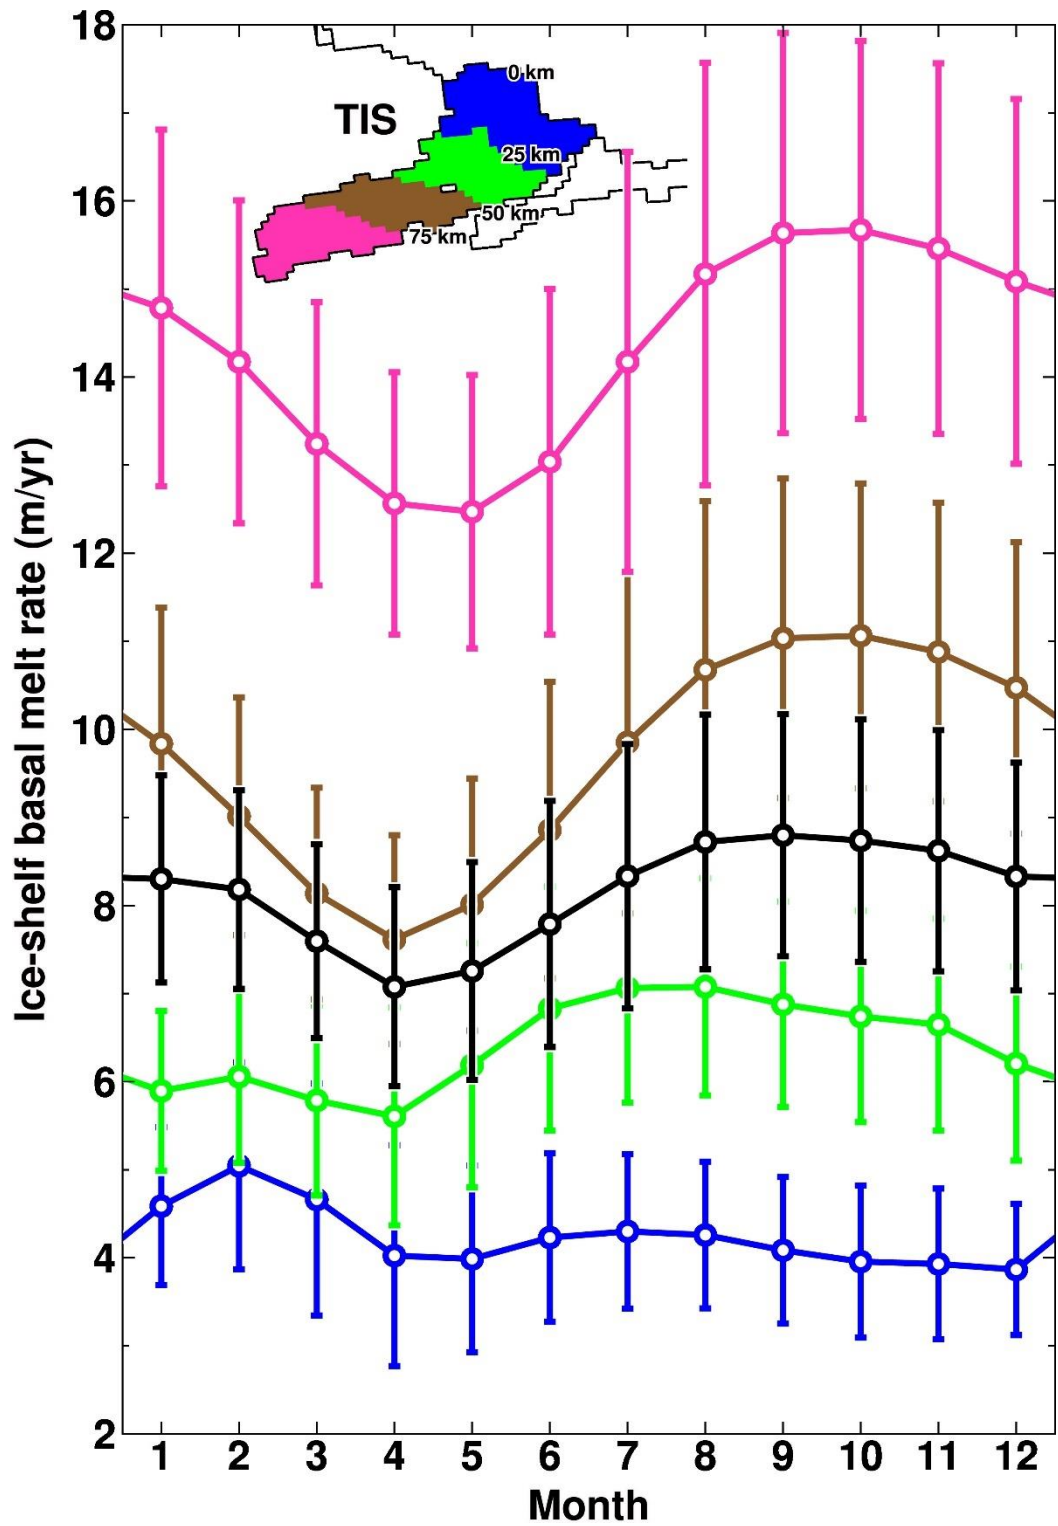

**Figure S4:** Seasonal variation in ice-shelf basal melt rate at the TIS. Blue, green, brown, and pink indicate the area-averaged melt rate in the four regions shown in the inset. Black shows the mean melt rate averaged over the TIS; circles and error bars show the mean and standard deviation of the melt rate for the reference period (1981–2010).

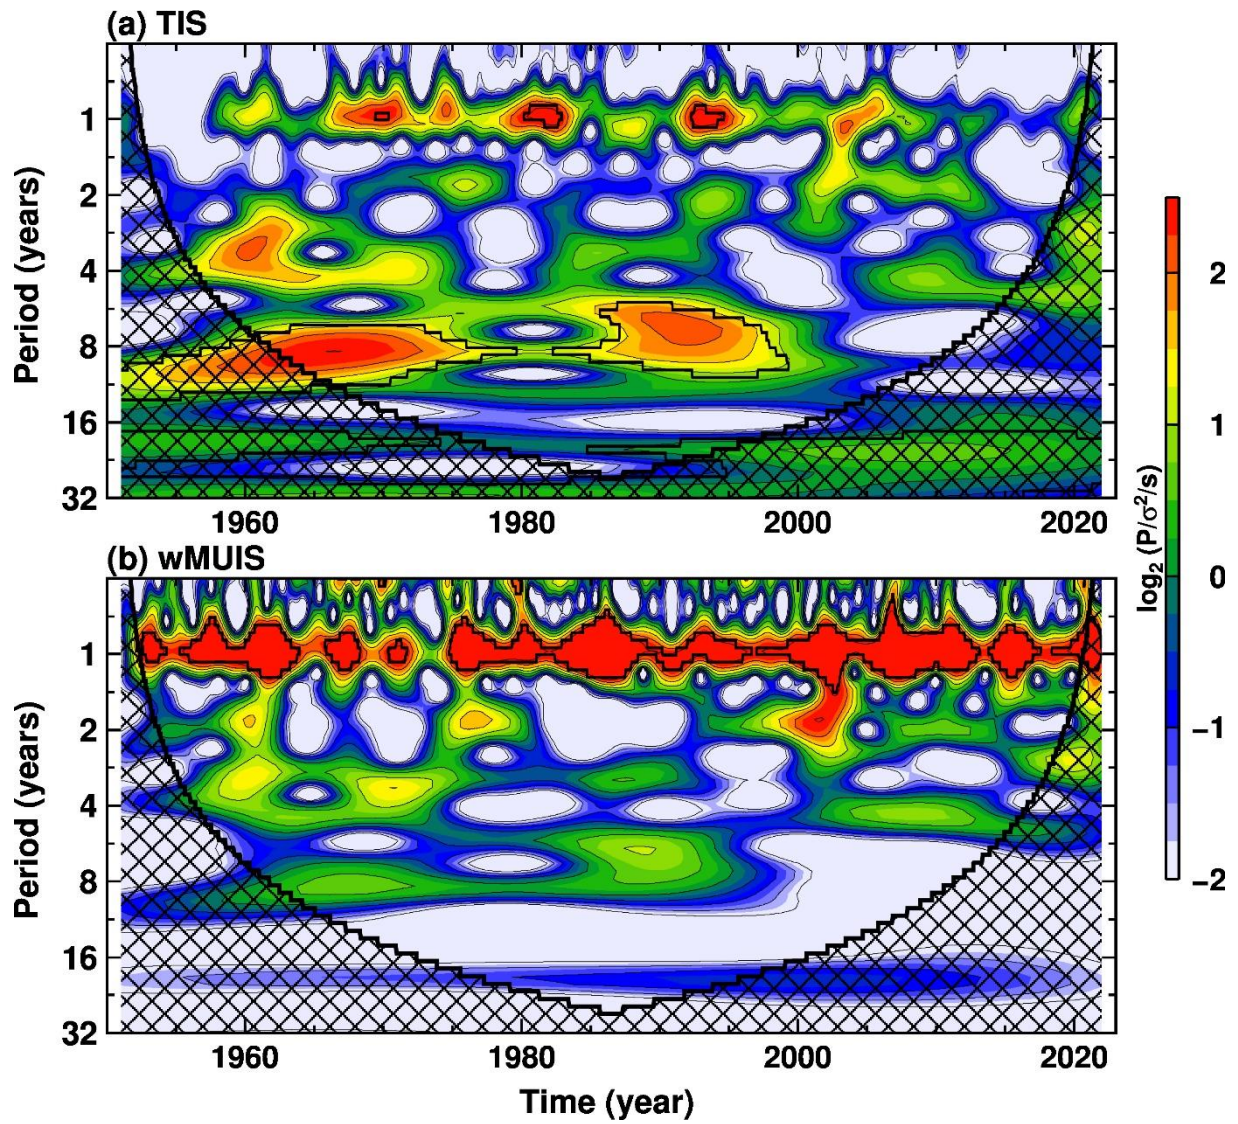

**Figure S5:** Wavelet power spectra for the ice-shelf basal melt rate in the TIS and wMUIS. The power spectrum is normalized by the variance ( $\sigma^2$ ) and the scale ( $s$ ). The vertical axis is the period (in year), and the horizontal axis is time (year). The regions enclosed by thick contours indicate time-period zones greater than the 95% confidence level. Cross-hatched regions indicate the cone of influence, where edge effects are not negligible.

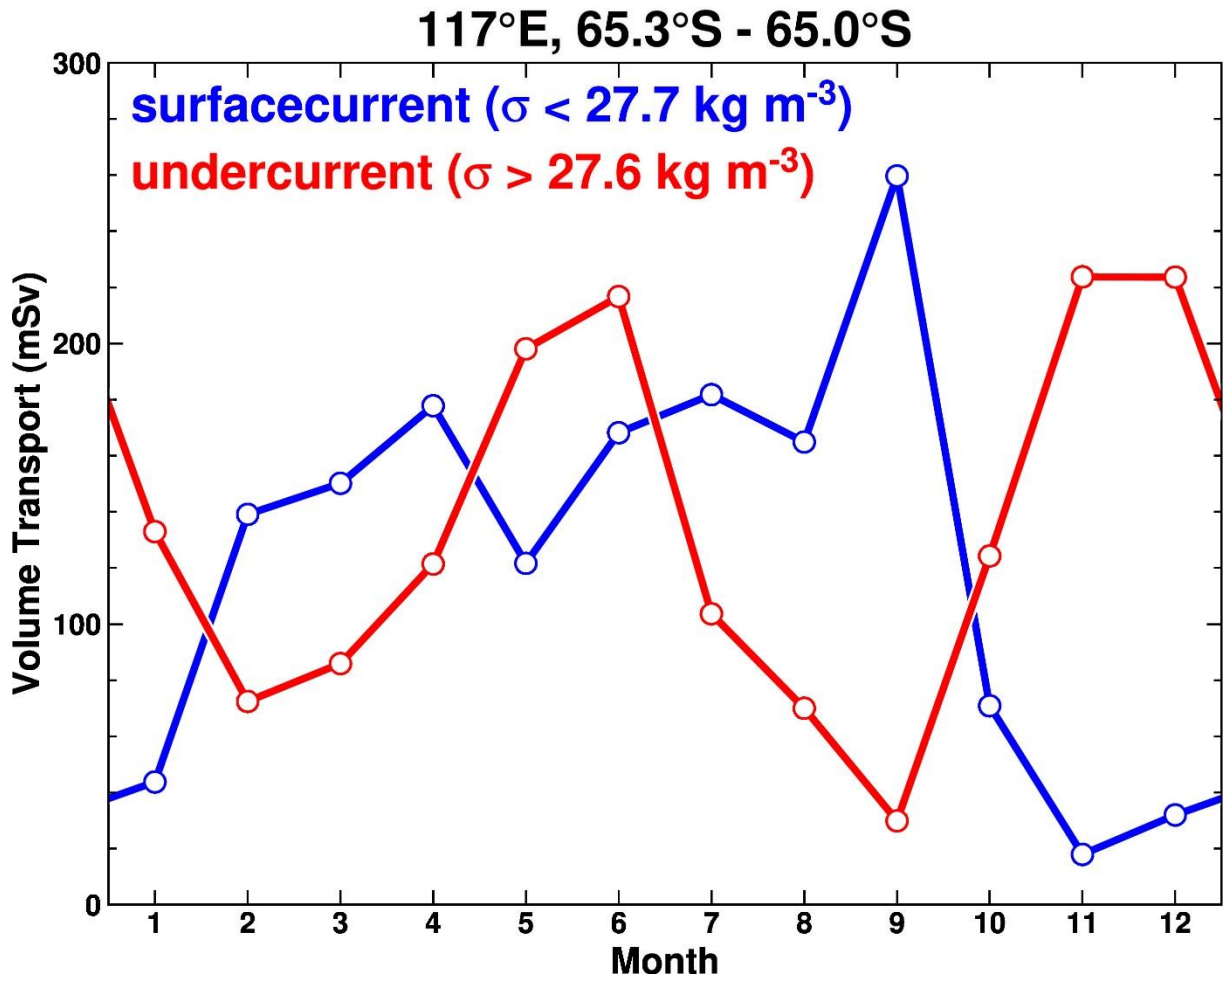

**Figure S6:** Seasonal variation in volume transports of the westward-flowing surface current (blue) and the eastward-flowing undercurrent (red). The monthly climatology averaged over the reference period 1981–2010 is used for the plot.
